# Supplementary material
Source: publisher site journal article supplement (https://www.dovepress.com/article/349106)
Supplement: Supplementary file 1 [file get_supplementary_file.php]

Spørgeskema

# Grønland | 2016

Arbejde og helbred i fiskeri og fiskeindustri i Grønland

Dansk | Grønlandsk

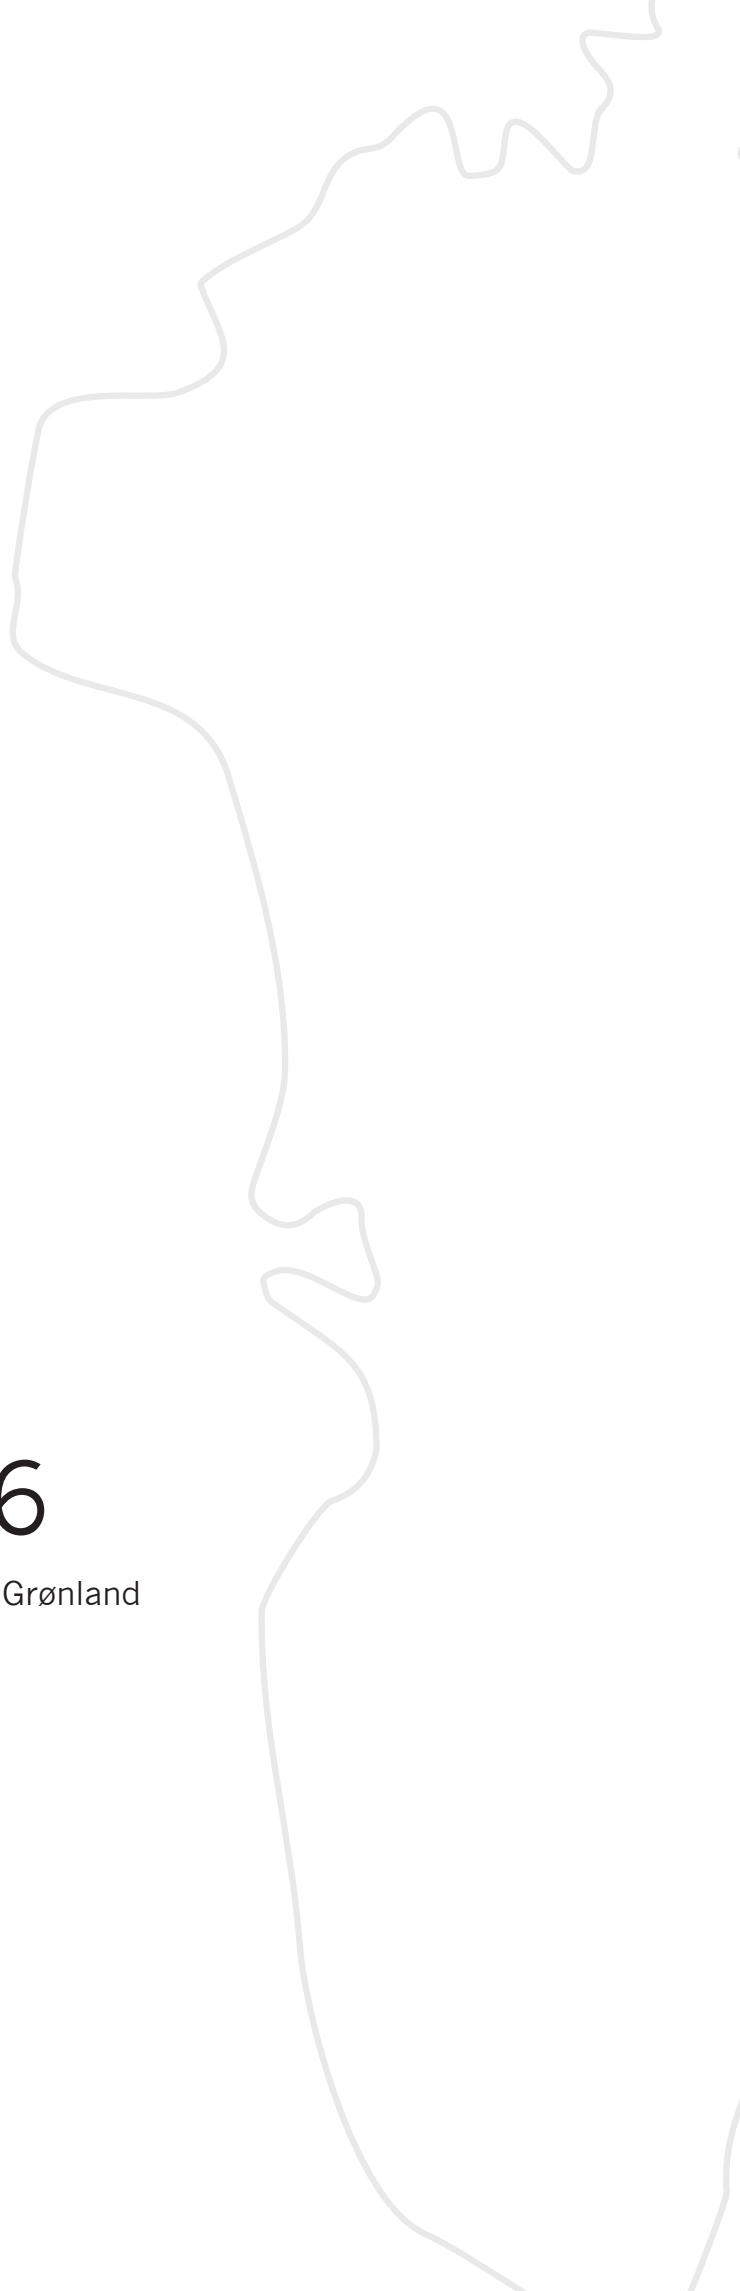

## Forord

Dette er den første samlede undersøgelse af arbejdsmiljø og helbred i fiskeri og fiskeindustri i Grønland. Undersøgelsens formål er:

**At belyse påvirkninger i arbejdet fra håndtering af skaldyr og fisk, fysiske påvirkninger som tunge løft samt risikoen for arbejdsulykker.**

**At belyse hvilke helbredsgener og symptomer det kan give anledning til**

**At bruge denne viden til at forbedre arbejdsmiljøet og forhindre at medarbejderne bliver syge af deres arbejde**

De oplysninger vi indsamler vil blive behandlet fortroligt – kun de læger der gennemfører undersøgelsen har adgang til materialet. I de resultater der kommer ud af undersøgelsen kan man ikke genkende den enkelte person.

Undersøgelsen er godkendt af de grønlandske myndigheder.

Det er frivilligt at deltage i undersøgelsen.

## Vejledning

Vi vil bede dig svare på alle spørgsmålene så godt du kan. Er du i tvivl om noget kan du spørge en af os i kantinen. Er der noget du vil uddybe eller forklare nærmere, vil du få mulighed til at fortælle det til lægerne når du bliver indkaldt til undersøgelse en af de kommende dage.

Venlig hilsen

**Lægerne arbejdsmedicinsk klinik i Herning, Ålborg og København  
Århus Universitet.**

# Personbeskrivelse

INUMMIK ALLAATIGINNINNEQ

LBNR: \_\_\_\_\_

1. Dato: \_\_\_\_\_  
Ulloq

2. CPR - Nr: \_\_\_\_\_  
Inuup normua

3. Efternavn: \_\_\_\_\_  
Naggat

4. Fornavn: \_\_\_\_\_  
Ateq

5. Adresse: \_\_\_\_\_  
Najugaq

6. Telefon: \_\_\_\_\_  
Telefon

7. Hvor er du født: \_\_\_\_\_  
Sumi inunngorpit

8. Køn: \_\_\_\_\_  
Suaaassuseq

Mand  
1 Angut

Kvinde  
2 Arnaq

9. Etnisk oprindelse:  Grønlandsk  Dansk  
1 kalaaleq 2 danskeq

## Dit arbejde

Suliat

10. Hvor længe har du været på nuværende arbejdsplads

Qanoq sivisutigisumik massakkut suliffigisanni sulivit

Antal år: \_\_\_\_\_  
Ukiuni qassini

11. Hvad er din tilknytning til nuværende arbejdsplads?

Massakkut suliffigisannut qanoq attuumassuteqarpit?

Fast Arbejde  
1 Aalajangersimasumik Sulisartooq

Sæsonarbejde  
2 Ukiup ilaatigut sulisartooq

12. Hvor mange timer om ugen arbejder du i dit nuværende job?

Massakkut suliffigisanni sapaatip akunneranut akunnerni qassini sulisarpit

Antal timer: \_\_\_\_\_  
akunnerit

## Symptomer fra huden

Eksem viser sig ved du bliver rød og irriteret i huden

Ammikkut ersiutit

Eksemeqaruit tamanna amminnik aappillersitsisimassaaq imaluunniit paamittisilluni

13. Har du nogensinde haft eksem på hænderne

Siornatigut assakkut eksemeqarnikuut

Ja  
1 Aap

Nej  
2 Naamik

14. Har du nogensinde haft eksem på underarmene?

Assaatikkut eksemeqarnikuut

Ja  
1 Aap

Nej  
2 Naamik

15. Hvornår havde du sidst eksem på hænder eller underarme?

Assakkut assaatikkullu qanga kingullermik eksemeqarpit?

|                                                                                                                      | Hænder<br>assakkut         | Underarm<br>assaatikkuut   |
|----------------------------------------------------------------------------------------------------------------------|----------------------------|----------------------------|
| Jeg har det i øjeblikket<br>Massakkut                                                                                | <input type="checkbox"/> 1 | <input type="checkbox"/> 1 |
| Ikke i øjeblikket, men indenfor de sidste 3 måneder<br>massakkuunngitsooq, kisianni qaammatini kingullerni pingasuni | <input type="checkbox"/> 2 | <input type="checkbox"/> 2 |
| Mellem 3 og 12 måneder siden<br>Qaammatit pingasut aamma 12-it akornanni                                             | <input type="checkbox"/> 3 | <input type="checkbox"/> 3 |
| Mere end 12 måneder siden<br>Qaammatit 12-it sinnerlugit                                                             | <input type="checkbox"/> 4 | <input type="checkbox"/> 4 |
| Hvilket år var sidste gang du havde eksem<br>Ukiq suna kingullermik eksemeqarpit                                     | _____                      | _____ (årstal)<br>(ukioq)  |

## 16. Har du bemærket om dit eksem bliver værre, når du arbejder med skaldyr, fisk, kemikalier eller andre produkter?

Qalerualinnik, aalisakkanik, akuutissanik nioqutissianilluunniit allanik suliaqaraangavit eksemippit ajortinneri malugisarpigit?

|               | Eksem på hænder<br>Assakut eksemit | Eksem på underarme<br>assaatikut eksemit |
|---------------|------------------------------------|------------------------------------------|
| Ja<br>Aap     | <input type="checkbox"/> 1         | <input type="checkbox"/> 1               |
| Nej<br>Naamik | <input type="checkbox"/> 2         | <input type="checkbox"/> 2               |

Hvis ja; hvilke ting drejer det sig om (skriv): \_\_\_\_\_

Aappeeruit; suut suliarigaangakkit (allaguk).

## 17. Bliver dit eksem bedre når du holder fri fra dit arbejde (f.eks. weekender og ferier)?

Suliffinniit freeraangavit (soorlu assersuutigalugu sap. akunnerata naanerani feriaminni) eksemernerit pitsangortarpa?

|                                          | Eksem på hænder<br>Assakut eksemit | Eksem på underarme<br>assaatikut eksemit |
|------------------------------------------|------------------------------------|------------------------------------------|
| Ja, som regel<br>Aap, tamatigut          | <input type="checkbox"/> 1         | <input type="checkbox"/> 1               |
| Ja, undertiden<br>Aap, ilaanneeriarlutik | <input type="checkbox"/> 2         | <input type="checkbox"/> 2               |
| Nej<br>Naamik                            | <input type="checkbox"/> 3         | <input type="checkbox"/> 3               |
| Ved ikke<br>Naluara                      | <input type="checkbox"/> 0         | <input type="checkbox"/> 0               |

## 18. Har du nogensinde haft nældefeber eller kløende udslæt? (hævede røde områder på huden som eventuelt kan være kløende - ligner myggestik)?

Siornatigut sapigaqarnikkut anillattoortarpit imaluunniit paaminnartunik anillattoortarpit (ippernat kiggiinut assingusunik)?(ammikkut aappillernerit pullattut imaluunniit anillannerit ungilattut)?

Ja  
1 Aap

Nej  
2 Naamik

## Symptomer fra næse og luftveje

Nuværende symptomer (de sidste 12 mdr.)

Sorlukkut torlukkullu malunniutit

Massakkut malunniutit (qaammatini 12-ini kingullerni)

## 19. Har du i de sidste 12 måneder haft hoste når du:

Qaammatini kingullerni 12-ini quersortarpit:

|                                                                                                                                         | Ja<br>Aap                  | Nej<br>Naamik              | Ved ikke<br>Naluara        |
|-----------------------------------------------------------------------------------------------------------------------------------------|----------------------------|----------------------------|----------------------------|
| Dyrker motion<br>Timersortillutit                                                                                                       | <input type="checkbox"/> 1 | <input type="checkbox"/> 2 | <input type="checkbox"/> 0 |
| Laver anstrengende arbejde<br>Assoroornartumik suliaqartillutit                                                                         | <input type="checkbox"/> 1 | <input type="checkbox"/> 2 | <input type="checkbox"/> 0 |
| Er i meget kold luft<br>Nillertorujussuarmitillutit                                                                                     | <input type="checkbox"/> 1 | <input type="checkbox"/> 2 | <input type="checkbox"/> 0 |
| Er forkølet eller har influenza<br>Nuatsillutit imaluunniit nuallullutit                                                                | <input type="checkbox"/> 1 | <input type="checkbox"/> 2 | <input type="checkbox"/> 0 |
| Ved stærke lugte (maling, tobak, parfume eller andet)<br>Tipit sakkortuut naamagaangakkit (qalipaait, tupá, tipigissaait allalluunniit) | <input type="checkbox"/> 1 | <input type="checkbox"/> 2 | <input type="checkbox"/> 0 |

## 20. Har du i de sidste 12 måneder haft piben/hvæsen fra din vejtrækning når du:

Qaammatini kingullerni 12-imi uinggialasumik/iggiinggasumik anersaartortarpit:

|                                                                                                                                        | Ja<br>Aap                             | Nej<br>Naamik                         | Ved ikke<br>Naluara                   |
|----------------------------------------------------------------------------------------------------------------------------------------|---------------------------------------|---------------------------------------|---------------------------------------|
| Dyrker motion<br>Timersortillutit                                                                                                      | <input type="checkbox"/> <sub>1</sub> | <input type="checkbox"/> <sub>2</sub> | <input type="checkbox"/> <sub>0</sub> |
| Laver anstrengende arbejde<br>Assoroornartumik suliaqartillutit                                                                        | <input type="checkbox"/> <sub>1</sub> | <input type="checkbox"/> <sub>2</sub> | <input type="checkbox"/> <sub>0</sub> |
| Er i meget kold luft<br>Niillertorujussuarmitillutit                                                                                   | <input type="checkbox"/> <sub>1</sub> | <input type="checkbox"/> <sub>2</sub> | <input type="checkbox"/> <sub>0</sub> |
| Er forkølet eller har influenza<br>Nuatsillutit imaluunniit nuallullutit                                                               | <input type="checkbox"/> <sub>1</sub> | <input type="checkbox"/> <sub>2</sub> | <input type="checkbox"/> <sub>0</sub> |
| Ved stærke lugte (maling, tobak, parfume eller andet)<br>Tipit sakkortuut naamagaangakkit (qalipaait, tupa, tipigissaait allaluunniit) | <input type="checkbox"/> <sub>1</sub> | <input type="checkbox"/> <sub>2</sub> | <input type="checkbox"/> <sub>0</sub> |

## 21. Har du i de sidste 12 måneder følt pressen for brystet eller været kortåndet når du:

Qaammatini kingullerni 12-imi sakissakut naqisimaneqarnermik imaluunniit anernikillioernermik misigisaqartarpit:

|                                                                                                                                        | Ja<br>Aap                             | Nej<br>Naamik                         | Ved ikke<br>Naluara                   |
|----------------------------------------------------------------------------------------------------------------------------------------|---------------------------------------|---------------------------------------|---------------------------------------|
| Dyrker motion<br>Timersortillutit                                                                                                      | <input type="checkbox"/> <sub>1</sub> | <input type="checkbox"/> <sub>2</sub> | <input type="checkbox"/> <sub>0</sub> |
| Laver anstrengende arbejde<br>Assoroornartumik suliaqartillutit                                                                        | <input type="checkbox"/> <sub>1</sub> | <input type="checkbox"/> <sub>2</sub> | <input type="checkbox"/> <sub>0</sub> |
| Er i meget kold luft<br>Niillertorujussuarmitillutit                                                                                   | <input type="checkbox"/> <sub>1</sub> | <input type="checkbox"/> <sub>2</sub> | <input type="checkbox"/> <sub>0</sub> |
| Er forkølet eller har influenza<br>Nuatsillutit imaluunniit nuallullutit                                                               | <input type="checkbox"/> <sub>1</sub> | <input type="checkbox"/> <sub>2</sub> | <input type="checkbox"/> <sub>0</sub> |
| Ved stærke lugte (maling, tobak, parfume eller andet)<br>Tipit sakkortuut naamagaangakkit (qalipaait, tupa, tipigissaait allaluunniit) | <input type="checkbox"/> <sub>1</sub> | <input type="checkbox"/> <sub>2</sub> | <input type="checkbox"/> <sub>0</sub> |

## 22. Når du er i kontakt med husstøv (rengøring, støvsugning, sengeredning) har du da sommetider nogle af disse symptomer?

Illup iluani pujoralammik najuussigaangavit (eqqajaajnermi, støvsugernermi, siniffilerineremi) malunniutit makku malugisarpigit?

|                                                                                       | Ja<br>Aap                             | Nej<br>Naamik                         |
|---------------------------------------------------------------------------------------|---------------------------------------|---------------------------------------|
| Hoste<br>Quersorneq                                                                   | <input type="checkbox"/> <sub>1</sub> | <input type="checkbox"/> <sub>2</sub> |
| Piben/hvæsen<br>Inngialasumik/iggiinggasumik anerneqalerneq                           | <input type="checkbox"/> <sub>1</sub> | <input type="checkbox"/> <sub>2</sub> |
| Føler trykken for brystet<br>Sakissakut naqisimaneqarneq                              | <input type="checkbox"/> <sub>1</sub> | <input type="checkbox"/> <sub>2</sub> |
| Bliver kortåndet<br>Anernikillioerneq                                                 | <input type="checkbox"/> <sub>1</sub> | <input type="checkbox"/> <sub>2</sub> |
| Får løbende eller stoppet næse<br>Kakkilertalerneq sorlunnilluunniit miliingatsisineq | <input type="checkbox"/> <sub>1</sub> | <input type="checkbox"/> <sub>2</sub> |
| Får nyseanfald<br>Tangajoqattaarneq                                                   | <input type="checkbox"/> <sub>1</sub> | <input type="checkbox"/> <sub>2</sub> |
| Får kløende eller løbende øjne<br>Isikkut ungillierneq quillioernerluunniit           | <input type="checkbox"/> <sub>1</sub> | <input type="checkbox"/> <sub>2</sub> |

### 23. Hoster du normalt slim op om morgenen? (For eksempel ved din første cigaret eller når du første gang går udenfor. At rømme sig/klare halsen tæller ikke med)

Ullaakkut quersorlutit nuammik nalinginnaasumik aniatitsisarpit? (Soorlu assersuutigalugu cigareti siulleq siullermilluunniit silamut anigaangavit. Iggiarissarneq tassani ilaatinneqassanngilaq)

Ja  
1 Aap

Nej  
2 Naamik

Hvis nej, gå til spg. 25

NAAGGAARUIT apeqqummut 16-imukarit

### 24. Har du hostet sådant slim op de fleste morgener i mindst 3 måneder i et år eller mere?

Ikinnerpaamik qaammatini pingasuni, ukiup ataatsip iluani amerianerusuniluunniit ullaakkut amerianertgut quersornikkut nuakoortarpit?

Ja  
1 Aap

Nej  
2 Naamik

Hvis ja, i hvor mange år?: \_\_\_\_\_ år

AAPPEERUIT, ukiuni qassini?

Ukiut

### 25. Hvilke af følgende udsagn passer bedst på din vejtrækning i de sidste 12 måneder?

Qaammatini 12-ini kingullerni ataani allassimasut anersaartorninnut tulluarnruppat?

Jeg har sjældent problemer med min vejtrækning  
1 Anersaartornera qaqutigut ajornartorsiutigisarpara

Jeg har sommetider problemer med min vejtrækning  
2 Anersaartornera ilaanneeriarlunga ajornartorsiutigisarpara

Jeg har ofte problemer med min vejtrækning  
3 Anersaartornera akulikitsumik ajornartorsiutigisarpara

Min vejtrækning er altid dårlig  
4 Anersaartornera ajortuannarpoq

## Tidligere symptomer

Siusinnerusukkut malunniutitnik ersittoqartarpa

### 26. Har du nogensinde haft høfeber (hermed menes nyseanfald med løbende eller stoppet næse, kløende næse, kløende eller løbende øjne, som kommer på specielle årstider)?

Naasuneersunik sapigaqartarnikuuit (tamatumani pineqarpoq tangajoqattaarneq kakkilertanermik imaluunniit sorlunnik militsitsisoq, qingakkut ungilatitsineq, isikkut ungalitsitsineq quilliliornerluunniit ukiup ilaani aalajannersimasuni takkuttartunik)?

Ja  
1 Aap

Nej  
2 Naamik

Hvis JA, hvilken årstid?

AAPPEERUIT, ukiu qanoq ilinerisigut?

Forår  
1 Upernaakkut

Sommer  
1 Aasakkut

Efterår  
1 Ukiakkut

Vinter  
1 Ukiukkut

### 27. Har din læge nogensinde fortalt dig, at du havde astma?

Nakorsap astmaqarnerit ilinnut oqaatiginikuuaa?

Ja  
1 Aap

Nej  
2 Naamik

Hvis JA, Hvor gammel var du, da en læge første gang fortalte dig du havde astma? \_\_\_\_\_ år.

Nakorsap siullermeerluni astmaqarnerit qassinik ukioqatutit oqaatiginikuuaa

Ukiut

# Symptomer på arbejdet

De næste spørgsmål handler om de symptomer du måtte have når du arbejder på fabrikken

SULINERMI MALUNNIUTIT

Apeqquutit tulluuttut fabrikkiimi sulininni sunniutaasinnaasuupput.

## 28. Når du arbejder på fabrikken får du da ofte:

Fabrikkiimi sulininni akulikitsumik:

|                                                                                                                  | Ja<br>Aap                             | Nej<br>Naamik                         |
|------------------------------------------------------------------------------------------------------------------|---------------------------------------|---------------------------------------|
| Løbende eller stoppet næse<br>Kakkilertasarpit qinngalluunniit miittarpa                                         | <input type="checkbox"/> <sub>1</sub> | <input type="checkbox"/> <sub>2</sub> |
| Nyseanfald<br>Tangajukulalersarpit                                                                               | <input type="checkbox"/> <sub>1</sub> | <input type="checkbox"/> <sub>2</sub> |
| Kløende eller løbende øjne<br>Isikkut ungiillisarpit qulliiulerlutiluunniit                                      | <input type="checkbox"/> <sub>1</sub> | <input type="checkbox"/> <sub>2</sub> |
| Kløe eller rødt udslæt på huden<br>Ungiillisarpit imaluunniit ammikkut aappalaartunik anillattarpit              | <input type="checkbox"/> <sub>1</sub> | <input type="checkbox"/> <sub>2</sub> |
| Føler hæshed eller får ondt i halsen<br>Iggiarlularsarpit imaluunniit toqqusaarlullutit                          | <input type="checkbox"/> <sub>1</sub> | <input type="checkbox"/> <sub>2</sub> |
| Føler dig utrolig træt<br>Qasoqqarujussuurtarpit                                                                 | <input type="checkbox"/> <sub>1</sub> | <input type="checkbox"/> <sub>2</sub> |
| Hovedpine<br>Niaqorluttarpit                                                                                     | <input type="checkbox"/> <sub>1</sub> | <input type="checkbox"/> <sub>2</sub> |
| Symptomer der ligner influenza<br>Nualluummut assingusunik malunniuteqartarpit                                   | <input type="checkbox"/> <sub>1</sub> | <input type="checkbox"/> <sub>2</sub> |
| Hoste<br>Quersortarpit                                                                                           | <input type="checkbox"/> <sub>1</sub> | <input type="checkbox"/> <sub>2</sub> |
| Hvæsen eller piben for brystet<br>Sakissakkut iggiinngasumik uingialuttumilluunniit nipinittarpa                 | <input type="checkbox"/> <sub>1</sub> | <input type="checkbox"/> <sub>2</sub> |
| Kortåndethed eller trykken over brystet<br>Anertikkalerneq imaluunniit sakissakkut naqinneqartutut misigisimaneq | <input type="checkbox"/> <sub>1</sub> | <input type="checkbox"/> <sub>2</sub> |

## Hvis ja

Aappeerut

29. Hvad arbejdede du med, da symptomerne startede? \_\_\_\_\_

Malunniutit takkuteqqaarmata suna suliaaraajuk?

30. Hvilket år startede symptomerne? \_\_\_\_\_

Ukioq suna malunniutit aallartippat

31. Plejede de at forsvinde, når sæsonen hvor du arbejdede på fabrikken var ovre?

Fabrikkiimi sulineq ukiup ilaatigut unitsinneqaraangat malunniutaaruttarpit?

<sub>1</sub> Ja  
Aap

<sub>2</sub> Nej  
Naamik

<sub>3</sub> I Nogen grad  
Ilaanneeriarlutik

## 32. Hvilket af følgende udsagn beskriver bedst din vejrtrækning, når du arbejder på fabrik?

Fabrikkiimi suligaangavit ataani sorliit anersaartorninnut assingunerusuuppat?

<sub>1</sub> Jeg har sjældent problemer med min vejrtrækning  
Anersaartornera qaqtigut ajornartorsiutigisarpara

<sub>2</sub> Jeg har sommetider problemer med min vejrtrækning  
Anersaartornera ilaanneeriarlunga ajornartorsiutigisarpara

<sub>3</sub> Jeg har ofte problemer med min vejrtrækning  
Anersaartornera akulikitsumik ajornartorsiutigisarpara

<sub>4</sub> Min vejrtrækning er altid dårlig, når jeg arbejder på fabrikken  
Fabrikkiimi suligaangama anersaartornera ajornartorsiutigiaannartarpa

# Familie

## Ilaquttat

### 33. Din nært beslægtede familie (far, mor, bedsteforældre, børn): lider nogen af dem nu, eller har de tidligere lidt, af følgende helbredsproblemer:

Ilaquttatit qaninnerpaat (ataatat, anaanat, aanakkutit aatakkutillu, meeqqat): taakku ilaat massakkut siusinnerusukkulluunniit peqqissutsimikkut makkuninnga ajornartorsiuteqartarpat:

|                                                | Ja<br>Aap                  | Uddyb, hvem der havde lidelsen<br>Kiap nappaateqarnera itisileruk | Nej<br>Naamik              |
|------------------------------------------------|----------------------------|-------------------------------------------------------------------|----------------------------|
| Astma<br>Astma                                 | <input type="checkbox"/> 1 | _____                                                             | <input type="checkbox"/> 2 |
| Høfeber<br>Naasunik sapigaqarneq               | <input type="checkbox"/> 1 | _____                                                             | <input type="checkbox"/> 2 |
| Børneeksem<br>Meeraallutik eksemeqartut        | <input type="checkbox"/> 1 | _____                                                             | <input type="checkbox"/> 2 |
| Kløende udslæt<br>Ungilannartunik anillannerit | <input type="checkbox"/> 1 | _____                                                             | <input type="checkbox"/> 2 |

# Rygning

## PUJORTARTARNEQ

### 34. Har du nogensinde røget?

Pujortartarnikuuit

1 Ja  
Aap

2 Nej (gå til spørgsmål 39)  
Naamik (apeqqut 31-mukarit)

### 35. Er du holdt op med at ryge?

Pujortarunnaaravit

1 Ja  
Aap

2 Nej (gå til spørgsmål 37)  
Naamik (apeqqut 29-mukarit)

### 36. Hvis ja, hvor gammel var du, da du holdt op? \_\_\_\_\_ år.

Aappeeruit, qassinik ukioqarlutit pujortassaapit?

### 37. Hvor meget ryger du eller røg du i gennemsnit?

Qassit pujortartarpigit imaluunniit siornatigut pujortartarpigit - agguaqatigiissillugit?

\_\_\_\_\_ cigaretter om dagen  
ullormut cigaretsit qassit

\_\_\_\_\_ cerutter eller cigarer om dagen  
Cigaavaqqat cigaallunniit ullaakkut

\_\_\_\_\_ pibestop om dagen  
Pujortaat ullormut qasseriarlugu

\_\_\_\_\_ snus/skrå  
Sunoorsi/sukulooq

### 38. Hvor gammel var du, da du begyndte at ryge? \_\_\_\_\_ år

Qassinik ukioqarlutit pujortartalerpit?

init



# Gener fra arme, skuldre, nakke og ryg

Tallikkut, tuikkut, pukutsukkut qitikkullu akornuti

Spørgsmålene handler om besvær (*smertes og gener*) i nakke, ryg, skuldre, albuer og hænder. For hvert spørgsmål skal du afkrydse ét felt i hver linje. Du skal sætte et kryds der passer bedst med hvor ondt du har - feks svarer 0 til at du slet ikke har besvær, 9 svarer til værst mulige smerter og 4-5 til smerter midt imellem. Afkryds det tal på skalaen der passer bedst til dig

Apeqqutini pingarput pukutsukkut, qitikkut, tuikkut, ikutsikkut assakkullu anniaatit akornutillu.

Apeqqutit immikkoortut titarnerni tamani ataasiinnarmik krydsiliffigissavatit. Anniarnippit sakkortussusaanut naapertuuttoq krydsilissavat – soorlu assersuutigalugu akornuteqanngilluinnaruit 0 krydsilissavat, 9 anniarnepaaffinnut naapertuuppoq, 4-5-ilu akunnattumik anniarnernut naapertuupput. Uuttuummi kisitsit ilinnut tulluarnepaaq krydsilissavat.

## Nakke

Pukusuk

### 39. Angiv graden af besvær (smerte eller ubehag) i nakken

Pukutsukkut akornutigisat nalileruk (anniarneq iluaagisarluunniit)

**Dit værste besvær inden for de sidste 3 mdr.:**

Qaammatini pingasuni kingullerni akornutiginerpaasat.:

**Hvor meget har besvær fra nakken hæmmet din aktivitet (arbejde eller fritid) de sidste 3 mdr.:**

Qaammatini piingasuni kingullerni pukutsukkut ilungersuanerit qanoq

annertutigisumiksulinarninnut akornusitigiva (sulininni imaluunniit sulingiffeqarninni):

↓ Slet intet besvær

Akornutaanngilluipooq

↓ Maksimalt besvær

Akornutaamerpaavoq

|   |   |   |   |   |   |   |   |   |   |
|---|---|---|---|---|---|---|---|---|---|
| 0 | 1 | 2 | 3 | 4 | 5 | 6 | 7 | 8 | 9 |
|---|---|---|---|---|---|---|---|---|---|

(Sæt kryds i den rubrik, der passer bedst for dig. Sæt ét kryds for hvert spørgsmål)

(Ungalusaq ilinnut tulluarnepaaq krydsileruk. Apeqqut ataasiinnarmik krydsilissavat)

↓ Har slet ikke hæmmet

Kigaalaarutiginggilara

↓ Har hæmmet mest muligt

Kigaalaarutaanerpaavoq

|   |   |   |   |   |   |   |   |   |   |
|---|---|---|---|---|---|---|---|---|---|
| 0 | 1 | 2 | 3 | 4 | 5 | 6 | 7 | 8 | 9 |
|---|---|---|---|---|---|---|---|---|---|

(Sæt kryds i den rubrik, der passer bedst for dig. Sæt ét kryds for hvert spørgsmål)

(Ungalusaq ilinnut tulluarnepaaq krydsileruk. Apeqqut ataasiinnarmik krydsilissavat)

## Højre skulder

Tui talerperleq

### 40. Angiv graden af besvær (smerte eller ubehag) i højre skulder

Tuikkut talerperlikkut akornutigisat nalileruk (anniarneq iluaagisarluunniit)

**Dit værste besvær inden for de sidste 3 mdr.:**

Qaammatini pingasuni kingullerni akornutiginerpaasat.:

**Hvor meget har besvær i højre skulder hæmmet din aktivitet (arbejde eller fritid) de sidste 3 mdr.:**

Qaammatini pingasuni kingullerni tuikkut talerperlikkut ilungersuanerit qanoq

annertutigisumik sulinnut akornusitigiva (sulininni imaluunniit sulingiffeqarninni):

↓ Slet intet besvær

Akornutaanngilluipooq

↓ Maksimalt besvær

Akornutaamerpaavoq

|   |   |   |   |   |   |   |   |   |   |
|---|---|---|---|---|---|---|---|---|---|
| 0 | 1 | 2 | 3 | 4 | 5 | 6 | 7 | 8 | 9 |
|---|---|---|---|---|---|---|---|---|---|

(Sæt kryds i den rubrik, der passer bedst for dig. Sæt ét kryds for hvert spørgsmål)

(Ungalusaq ilinnut tulluarnepaaq krydsileruk. Apeqqut ataasiinnarmik krydsilissavat)

↓ Har slet ikke hæmmet

Kigaalaarutiginggilara

↓ Har hæmmet mest muligt

Kigaalaarutaanerpaavoq

|   |   |   |   |   |   |   |   |   |   |
|---|---|---|---|---|---|---|---|---|---|
| 0 | 1 | 2 | 3 | 4 | 5 | 6 | 7 | 8 | 9 |
|---|---|---|---|---|---|---|---|---|---|

(Sæt kryds i den rubrik, der passer bedst for dig. Sæt ét kryds for hvert spørgsmål)

(Ungalusaq ilinnut tulluarnepaaq krydsileruk. Apeqqut ataasiinnarmik krydsilissavat)

## Venstre skulder

Tui saamerleq

### 41. Angiv graden af besvær (smerte eller ubehag) i venstre skulder

Tuikkut saamerlikkut akornutigisat nalileruk (anniarneq iluaagisarluunniit)

**Dit værste besvær inden for de sidste 3 mdr.:**

Qaammatini pingasuni kingullerni akornutiginerpaasat.:

**Hvor meget har besvær i venstre skulder hæmmet din aktivitet (arbejde eller fritid) de sidste 3 mdr.:**

Qaammatini pingasuni kingullerni tuikkut saamerlikkut ilungersuanerit qanoq

annertutigisumik akornusitigiva (sulininni sulingiffeqarninilu):

↓ Slet intet besvær

Akornutaanngilluipooq

↓ Maksimalt besvær

Akornutaamerpaavoq

|   |   |   |   |   |   |   |   |   |   |
|---|---|---|---|---|---|---|---|---|---|
| 0 | 1 | 2 | 3 | 4 | 5 | 6 | 7 | 8 | 9 |
|---|---|---|---|---|---|---|---|---|---|

(Sæt kryds i den rubrik, der passer bedst for dig. Sæt ét kryds for hvert spørgsmål)

(Ungalusaq ilinnut tulluarnepaaq krydsileruk. Apeqqut ataasiinnarmik krydsilissavat)

↓ Har slet ikke hæmmet

Kigaalaarutiginggilara

↓ Har hæmmet mest muligt

Kigaalaarutaanerpaavoq

|   |   |   |   |   |   |   |   |   |   |
|---|---|---|---|---|---|---|---|---|---|
| 0 | 1 | 2 | 3 | 4 | 5 | 6 | 7 | 8 | 9 |
|---|---|---|---|---|---|---|---|---|---|

(Sæt kryds i den rubrik, der passer bedst for dig. Sæt ét kryds for hvert spørgsmål)

(Ungalusaq ilinnut tulluarnepaaq krydsileruk. Apeqqut ataasiinnarmik krydsilissavat)

# Højre albue

Ikusik talerperleq

## 42. Angiv graden af besvær (smerte eller ubehag) i højre albue

Ikutsikkut talerperlikkut akornutigisat nalileruk (anniarneq iluaagisarluunniit)

### Dit værste besvær inden for de sidste 3 mdr.:

Qaammatini pingasuni kingullerni akornutiginerpaasat:

|                                              |   |   |   |   |                                          |   |   |   |   |
|----------------------------------------------|---|---|---|---|------------------------------------------|---|---|---|---|
| ↓ Slet intet besvær<br>Akornutaanngilluipooq |   |   |   |   | ↓ Maksimalt besvær<br>Akornutaamerpaavoq |   |   |   |   |
| 0                                            | 1 | 2 | 3 | 4 | 5                                        | 6 | 7 | 8 | 9 |

(Sæt kryds i den rubrik, der passer bedst for dig. Sæt ét kryds for hvert spørgsmål)  
(Ungalusaq ilinnut tulluarnerpaaq krydsileruk. Apeqquq ataasiinnarmik krydsilissavat)

### Hvor meget har besvær i højre albue hæmmet din aktivitet (arbejde eller fritid) de sidste 3 mdr.:

Qaammatini pingasuni kingullerni tuikkut talerperlikkut ilungersuanerit qanoq annertutigisumik akornusiitigiva (sulinninni sulinngiffeqarninnilu):

|                                                 |   |   |   |   |                                                    |   |   |   |   |
|-------------------------------------------------|---|---|---|---|----------------------------------------------------|---|---|---|---|
| ↓ Har slet ikke hæmmet<br>Kigaalaarutigingilara |   |   |   |   | ↓ Har hæmmet mest muligt<br>Kigaalaarutaanerpaavoq |   |   |   |   |
| 0                                               | 1 | 2 | 3 | 4 | 5                                                  | 6 | 7 | 8 | 9 |

(Sæt kryds i den rubrik, der passer bedst for dig. Sæt ét kryds for hvert spørgsmål)  
(Ungalusaq ilinnut tulluarnerpaaq krydsileruk. Apeqquq ataasiinnarmik krydsilissavat)

# Venstre albue

Ikusik saamerleq

## 43. Angiv graden af besvær (smerte eller ubehag) i venstre albue

Ikutsikkut saamerlikkut akornutigisat nalileruk (anniarneq iluaagisarluunniit)

### Dit værste besvær inden for de sidste 3 mdr.:

Qaammatini pingasuni kingullerni akornutiginerpaasat:

|                                              |   |   |   |   |                                          |   |   |   |   |
|----------------------------------------------|---|---|---|---|------------------------------------------|---|---|---|---|
| ↓ Slet intet besvær<br>Akornutaanngilluipooq |   |   |   |   | ↓ Maksimalt besvær<br>Akornutaamerpaavoq |   |   |   |   |
| 0                                            | 1 | 2 | 3 | 4 | 5                                        | 6 | 7 | 8 | 9 |

(Sæt kryds i den rubrik, der passer bedst for dig. Sæt ét kryds for hvert spørgsmål)  
(Ungalusaq ilinnut tulluarnerpaaq krydsileruk. Apeqquq ataasiinnarmik krydsilissavat)

### Hvor meget har besvær i venstre albue hæmmet din aktivitet (arbejde eller fritid) de sidste 3 mdr.:

Qaammatini pingasuni kingullerni ikutsikkut saamerlikkut ilungersuanerit qanoq annertutigisumik akornusiiva (sulinninni sulinngiffeqarninnilu):

|                                                 |   |   |   |   |                                                    |   |   |   |   |
|-------------------------------------------------|---|---|---|---|----------------------------------------------------|---|---|---|---|
| ↓ Har slet ikke hæmmet<br>Kigaalaarutigingilara |   |   |   |   | ↓ Har hæmmet mest muligt<br>Kigaalaarutaanerpaavoq |   |   |   |   |
| 0                                               | 1 | 2 | 3 | 4 | 5                                                  | 6 | 7 | 8 | 9 |

(Sæt kryds i den rubrik, der passer bedst for dig. Sæt ét kryds for hvert spørgsmål)  
(Ungalusaq ilinnut tulluarnerpaaq krydsileruk. Apeqquq ataasiinnarmik krydsilissavat)

# Højre hånd/håndled

Assak/paffik talerperleqa

## 44. Angiv graden af besvær (smerte eller ubehag) i højre hånd/håndled

Assakkut/paffikkut akornutigisat nalileruk (anniarneq iluaagisarluunniit)

### Dit værste besvær inden for de sidste 3 mdr.:

Qaammatini pingasuni kingullerni akornutiginerpaasat:

|                                              |   |   |   |   |                                          |   |   |   |   |
|----------------------------------------------|---|---|---|---|------------------------------------------|---|---|---|---|
| ↓ Slet intet besvær<br>Akornutaanngilluipooq |   |   |   |   | ↓ Maksimalt besvær<br>Akornutaamerpaavoq |   |   |   |   |
| 0                                            | 1 | 2 | 3 | 4 | 5                                        | 6 | 7 | 8 | 9 |

(Sæt kryds i den rubrik, der passer bedst for dig. Sæt ét kryds for hvert spørgsmål)  
(Ungalusaq ilinnut tulluarnerpaaq krydsileruk. Apeqquq ataasiinnarmik krydsilissavat)

### Hvor meget har besvær i højre hånd/håndled hæmmet din aktivitet (arbejde eller fritid) de sidste 3 mdr.:

Qaammatini pingasuni kingullerni assakkut/paffikkut talerperlikkut ilungersuanerit qanoq annertutigisumik akornusiiva (sulinninni sulinngiffeqarninnilu):

|                                                 |   |   |   |   |                                                    |   |   |   |   |
|-------------------------------------------------|---|---|---|---|----------------------------------------------------|---|---|---|---|
| ↓ Har slet ikke hæmmet<br>Kigaalaarutigingilara |   |   |   |   | ↓ Har hæmmet mest muligt<br>Kigaalaarutaanerpaavoq |   |   |   |   |
| 0                                               | 1 | 2 | 3 | 4 | 5                                                  | 6 | 7 | 8 | 9 |

(Sæt kryds i den rubrik, der passer bedst for dig. Sæt ét kryds for hvert spørgsmål)  
(Ungalusaq ilinnut tulluarnerpaaq krydsileruk. Apeqquq ataasiinnarmik krydsilissavat)

# Venstre hånd/håndled

Assak/paffik saamerleq

## 45. Angiv graden af besvær (smerte eller ubehag) i venstre hånd/håndled

Assakut/paffikkut saamerlikkut nalileruk (anniarneq iluaagisarluunniit)

### Dit værste besvær inden for de sidste 3 mdr.:

Qaammatini pingasuni kingullerni akornutiginerpaasat:

### Hvor meget har besvær i venstre hånd/håndled hæmmet din aktivitet (arbejde eller fritid) de sidste 3 mdr.:

Qaammatini pingasuni kingullerni assakut/paffikkut saamerlikkut ilungersuanerit qanoq annertutigisumik akornusiiva (sulininni sulningiffeqarninnilu):

↓ Slet intet besvær  
Akornutaanngilluipooq

↓ Maksimalt besvær  
Akornutaamerpaavoq

|   |   |   |   |   |   |   |   |   |   |
|---|---|---|---|---|---|---|---|---|---|
| 0 | 1 | 2 | 3 | 4 | 5 | 6 | 7 | 8 | 9 |
|---|---|---|---|---|---|---|---|---|---|

(Sæt kryds i den rubrik, der passer bedst for dig. Sæt ét kryds for hvert spørgsmål)  
(Ungalusaq ilinnut tulluarnerpaaq krydsileruk. Apeqquq ataasiinnarmik krydsilissavat)

↓ Har slet ikke hæmmet  
Kigaalaarutigingilara

↓ Har hæmmet mest muligt  
Kigaalaarutaanerpaavoq

|   |   |   |   |   |   |   |   |   |   |
|---|---|---|---|---|---|---|---|---|---|
| 0 | 1 | 2 | 3 | 4 | 5 | 6 | 7 | 8 | 9 |
|---|---|---|---|---|---|---|---|---|---|

(Sæt kryds i den rubrik, der passer bedst for dig. Sæt ét kryds for hvert spørgsmål)  
(Ungalusaq ilinnut tulluarnerpaaq krydsileruk. Apeqquq ataasiinnarmik krydsilissavat)

# Føleforstyrrelser i fingrene

Inussat misigissusaatigut ippigisat

## 46. Sker det, at du har sovende, snurrende eller prikkende fornemmelser i fingrene (bortset fra, når du har siddet eller ligget forkert med armene)?

Sinitsillutit inussakut misigisaarunnermik, kakillaalutsitsinermik kaportuusinermilluunniit malugisaqartarpi (issianerlunnak imaluunniit tallitit iluatsumik innangavigisimagaangakkit)?

Ja  
1 Aap

Nej  
2 Naamik

## 47. Hvor ofte har du inden for de sidste 3 måneder haft soven, snurrende og prikkende fornemmelser i fingrene?

Qaammatini pingasuni kingullerni inussavit misigisaarunneri, kikillaalunneri koportuusineriluunniit misigisarpigit?

|                                                                       | Højre hånd<br>Assak talerperleq | Venstre hånd<br>Assak saamerleq |
|-----------------------------------------------------------------------|---------------------------------|---------------------------------|
| Aldrig<br>Misiginngisaannarpara                                       | <input type="checkbox"/> 1      | <input type="checkbox"/> 1      |
| Sjældent<br>Qaqutigut                                                 | <input type="checkbox"/> 2      | <input type="checkbox"/> 2      |
| Mindst 1 gang om måneden<br>Ikinnerpaamik qaammammut ataasiarlunga    | <input type="checkbox"/> 3      | <input type="checkbox"/> 3      |
| Mindst 1 gang om ugen<br>Ikinnerpaamik sap. akunneranut ataasiarlunga | <input type="checkbox"/> 4      | <input type="checkbox"/> 4      |
| Dagligt<br>Ullut tamaasa                                              | <input type="checkbox"/> 5      | <input type="checkbox"/> 5      |

# Lænderyggen

Makisik

## 48. Angiv graden af besvær (smerte eller ubehag) i lænderyggen.

Makitsikkut erloqissutivit anertussusai allakkit (anniarneq iluaalliornerluunniit).

### Dit værste besvær inden for de sidste 3 mdr.:

Qaammatini pingasuni kingullerni akornutiginerpaasat:

### Hvor meget har lænderygbesvær hæmmet din aktivitet (arbejde eller fritid) de sidste 3 mdr.:

Qaammatini pingasuni kingullerni makitsikkut ilungersuanerit qanoq annertutigisumik akornusiiva (sulininni sulningiffeqarninnilu):

↓ Slet intet besvær  
Akornutaanngilluipooq

↓ Maksimalt besvær  
Akornutaamerpaavoq

|   |   |   |   |   |   |   |   |   |   |
|---|---|---|---|---|---|---|---|---|---|
| 0 | 1 | 2 | 3 | 4 | 5 | 6 | 7 | 8 | 9 |
|---|---|---|---|---|---|---|---|---|---|

(Sæt kryds i den rubrik, der passer bedst for dig. Sæt ét kryds for hvert spørgsmål)  
(Ungalusaq ilinnut tulluarnerpaaq krydsileruk. Apeqquq ataasiinnarmik krydsilissavat)

↓ Har slet ikke hæmmet  
Kigaalaarutigingilara

↓ Har hæmmet mest muligt  
Kigaalaarutaanerpaavoq

|   |   |   |   |   |   |   |   |   |   |
|---|---|---|---|---|---|---|---|---|---|
| 0 | 1 | 2 | 3 | 4 | 5 | 6 | 7 | 8 | 9 |
|---|---|---|---|---|---|---|---|---|---|

(Sæt kryds i den rubrik, der passer bedst for dig. Sæt ét kryds for hvert spørgsmål)  
(Ungalusaq ilinnut tulluarnerpaaq krydsileruk. Apeqquq ataasiinnarmik krydsilissavat)

# 49. Sikkerhed

Isumannaarineq

Sæt **ét** kryds ud for hvert spørgsmål

Apeqquitiit tamaasa ataasiinnarmik krydsilissavatti

|                                                                                                                                                                                                                                                                              | <b>Meget uenig</b><br>Isumaqaṭiginḡilluinnarpa | <b>Uenig</b><br>Isumaqaṭiginḡilara | <b>Enig</b><br>Isumaqaṭaavunga | <b>Meget enig</b><br>Assut isumaqaṭaavunga |
|------------------------------------------------------------------------------------------------------------------------------------------------------------------------------------------------------------------------------------------------------------------------------|------------------------------------------------|------------------------------------|--------------------------------|--------------------------------------------|
| <b>Ledelsen bestræber sig på at tilrettelægge sikkerhedsrutiner, som er meningsfulde og velfungerende</b><br>Aqutsis qarḡissit ilungersuullugu pingaarutilinnik isumannaarinermut sungiusimasanik iluamik ingerlatḡisipput                                                   | <input type="checkbox"/> 1                     | <input type="checkbox"/> 2         | <input type="checkbox"/> 3     | <input type="checkbox"/> 4                 |
| <b>Ledelsen sikrer, at alle og enhver har indflydelse på sikkerheden i deres arbejde</b><br>Aqutsisut suliffiup isumannaatsuunissaanu sunniuteqaqataaniḡaḡ qularnaarpaat                                                                                                     | <input type="checkbox"/> 1                     | <input type="checkbox"/> 2         | <input type="checkbox"/> 3     | <input type="checkbox"/> 4                 |
| <b>Ledelsen opmuntrer medarbejderne til at deltage i beslutninger, som påvirker deres sikkerhed</b><br>Aqutsisut sulisut isumannaarḡarnissaannut sunneeqaṭaaniḡaminnik aalajangeeqataaniḡaḡ kaammattortarpaat                                                                | <input type="checkbox"/> 1                     | <input type="checkbox"/> 2         | <input type="checkbox"/> 3     | <input type="checkbox"/> 4                 |
| <b>Ledelsen tager aldrig hensyn til medarbejdernes forslag vedrørende sikkerhed</b><br>Aqutsisut isumannaarḡarnissaannut siunnersuutaat aqutsisut soqutiginḡ ajorpaat                                                                                                        | <input type="checkbox"/> 1                     | <input type="checkbox"/> 2         | <input type="checkbox"/> 3     | <input type="checkbox"/> 4                 |
| <b>Ledelsen bestræber sig på, at alle på arbejdspladsen opnår høje kompetencer hvad angår sikkerhed og risici</b><br>Aqutsisut suliffimmiittut tamarmik isumannaarḡarnissaannut navianartoḡarnissamullu piginnaaneqarluaḡniḡaḡ anguniagaraat                                 | <input type="checkbox"/> 1                     | <input type="checkbox"/> 2         | <input type="checkbox"/> 3     | <input type="checkbox"/> 4                 |
| <b>Ledelsen spørger aldrig om medarbejdernes mening, inden den træffer beslutninger vedrørende sikkerhed</b><br>Isumannaarḡineq pillugu aalajangiḡisoḡḡnḡinnerani aqutsisut sulisumi isumaat apeqquṭiginḡ ajorpaat.                                                          | <input type="checkbox"/> 1                     | <input type="checkbox"/> 2         | <input type="checkbox"/> 3     | <input type="checkbox"/> 4                 |
| <b>Ledelsen inddrager medarbejderne i beslutninger vedrørende sikkerhed</b><br>Isumannaarḡineq pillugu aalajangiḡinḡni sulisut ilanḡuttarpaat.                                                                                                                               | <input type="checkbox"/> 1                     | <input type="checkbox"/> 2         | <input type="checkbox"/> 3     | <input type="checkbox"/> 4                 |
| <b>Ledelsen indsamler nøjagtige informationer i forbindelse med ulykkesanalyser</b><br>Ajutoortoḡarneranik misissueqḡissaarnermi aqutsisut paasissutḡissanik eqqortunik katersuisarput.                                                                                      | <input type="checkbox"/> 1                     | <input type="checkbox"/> 2         | <input type="checkbox"/> 3     | <input type="checkbox"/> 4                 |
| <b>Frygt for sanktioner (negative konsekvenser) fra ledelsen afskrækker medarbejdere fra at rapportere nærulykker</b><br>Sulisut ajoḡuserni najuuttut ajoḡusernermik nalunaaruteḡarnissartik annilaangagisarpaat, aqutsisuniit kingunenerlutsḡisoḡarnissaa annilaangagalugu. | <input type="checkbox"/> 1                     | <input type="checkbox"/> 2         | <input type="checkbox"/> 3     | <input type="checkbox"/> 4                 |
| <b>Ledelsen lytter omhyggeligt til alle, som har været involveret i en ulykkeshændelse</b><br>Ajutoornernik pḡoḡartillugu aqutsisut peḡḡissaartumik ajoḡusernermi ilaasut tusarnaartarpaat.                                                                                  | <input type="checkbox"/> 1                     | <input type="checkbox"/> 2         | <input type="checkbox"/> 3     | <input type="checkbox"/> 4                 |
| <b>Ledelsen søger efter årsager, ikke skyldige personer, når en ulykke indtræffer</b><br>Ajutoortoḡartillugu aqutsisut ajoḡusernermut peḡḡutaasut ujartortarpaat, ajutoornermut pḡsuutḡissanik ujaasinatik.                                                                  | <input type="checkbox"/> 1                     | <input type="checkbox"/> 2         | <input type="checkbox"/> 3     | <input type="checkbox"/> 4                 |

|                                                                                                                                                                                      | <b>Meget uenig</b><br>Isumaqatiginngilluinnarpara | <b>Uenig</b><br>Isumaqatiginngilara | <b>Enig</b><br>Isumaqataavunga | <b>Meget enig</b><br>Assut isumaqataavunga |
|--------------------------------------------------------------------------------------------------------------------------------------------------------------------------------------|---------------------------------------------------|-------------------------------------|--------------------------------|--------------------------------------------|
| <b>Ledelsen giver altid medarbejderne skylden for ulykker</b><br>Aqutsisut ajutoornerni tamani sulisut pisuutitaarpaat.                                                              | <input type="checkbox"/> 1                        | <input type="checkbox"/> 2          | <input type="checkbox"/> 3     | <input type="checkbox"/> 4                 |
| <b>Ledelsen behandler medarbejdere retfærdigt, hvis de indblandes i en ulykke</b><br>Sulisut ajoqusernemi peqataasimappata aqutsisut sulisut naapertuilluartumik oqaloqatigisarpaat. | <input type="checkbox"/> 1                        | <input type="checkbox"/> 2          | <input type="checkbox"/> 3     | <input type="checkbox"/> 4                 |

## Beskriv hvordan du selv håndterer sikkerhed

Isumannaallisaa neq illit nammineq qanoq atorsinnaanerlugu nassuiaruk

|                                                                                                                                                                                                                                                   | <b>Meget uenig</b><br>Isumaqatiginngilluinnarpara | <b>Uenig</b><br>Isumaqatiginngilara | <b>Enig</b><br>Isumaqataavunga | <b>Meget enig</b><br>Assut isumaqataavunga |
|---------------------------------------------------------------------------------------------------------------------------------------------------------------------------------------------------------------------------------------------------|---------------------------------------------------|-------------------------------------|--------------------------------|--------------------------------------------|
| <b>Jeg bøjer nogle gange sikkerhedsreglerne, så jeg kan gøre arbejdet lettere og bedre</b><br>Isumannaallisaa nermit maleruaqqusaat ilaanneeriarlunga avaqqutitaartapakka sulineq oqinnerulersinniarlugu pitsaanerulersillugulu.                  | <input type="checkbox"/> 1                        | <input type="checkbox"/> 2          | <input type="checkbox"/> 3     | <input type="checkbox"/> 4                 |
| <b>Ved at ignorere sikkerhedsregler glider arbejdet nogle gange lettere.</b><br>Isumannaallisaa nermit maleruaqqusat soqutinnigitsuusaarnerisa suliaq ilaannikkut oqinnerulersittarpaat.                                                          | <input type="checkbox"/> 1                        | <input type="checkbox"/> 2          | <input type="checkbox"/> 3     | <input type="checkbox"/> 4                 |
| <b>Jeg overtræder sikkerhedsreglerne hvis jeg føler det ikke betyder nogen øget sikkerhedsrisiko.</b><br>Isumannaallisaa nermit maleruaqqusat unioqquittarpakka isumaqaruma tamanna isumannaallisaa nermit annertunerusumik navianaateqanngitsoq. | <input type="checkbox"/> 1                        | <input type="checkbox"/> 2          | <input type="checkbox"/> 3     | <input type="checkbox"/> 4                 |

## Arbejdsulykker

Sulisilluni ajoqusernerit

Arbejdsulykker er begivenheder der sker pludseligt, f.eks hvis man skærer sig på en kniv eller bliver ramt af en genstand der falder ned. Arbejdsulykker kan give anledning til du må holde en pause i arbejdet, eller være mere alvorlige så du må behandles hos læge/på sygehuset. Arbejdsulykker kan også give anledning til du må sygemeldes.

Sulisilluni ajoqusernerit tassaapput tassangaannaq pisut, soorlu assersuutigalugu savimmut kileraanni imaluunniit atortussianik nakkarfigitinnermi. Sulisilluni ajoqusernerit suliinnaarallarnissannik kinguneqarsinnaapput, imaluunniit ima annertutigisinnaapput nakorsamit/napparsimmavimmi passunneqarnissamik kinguneqarsinnaalluti. Aamma sulisilluni ajoqusernerit sulinnigiffeqarallarnissannik kinguneqarsinnaapput

### 50. Har du været udsat for en arbejdsulykke på din nuværende arbejdsplads?

(ulykken skal som minimum have givet anledning til du måtte holde pause i arbejdet, mens du selv eller en anden på arbejdspladsen behandlede skaden)

Massakkut suliffigisanni sulisillutit ajoqusernikuuit?

(ajoquserneq sulinnikk unitsitsigallarnissamik kinguneqarsinnaavoq, nammineerlutit imaluunniit suliffinni allamik ajoqusernerit passunneqarsimappat)

1 Ja  
Aap

2 Nej  
Naamik

Hvis ja

1 Indenfor den sidste måned  
qaammatip siuliani pisimappat

2 Indenfor det sidste år  
ukiumi kingullermi pisimappat

## 51. Gav arbejdsulykken anledning til du blev sygemeldt?

Sulisillutit ajoqusernerit sulinggifteqarnermik kinguneqarpa?

Ja  
1 Aap

Nej  
2 Naamik

Hvis **ja**, skriv antal dage du var sygemeldt: \_\_\_\_\_ dage

Aappeeruit, ulluni qassini sulinggifteqarsimanerit allassavat

## 52. Hvordan skete ulykken?

(man må gerne sætte flere kryds)

Qanoq ajoquserpit?

(arlalinnik krydsiisinaavutit)

Jeg skar mig på en kniv

Savimmut kilerama

1

Jeg skar mig på en anden skarp genstand

atortussiamut allamut ipittumut kilerama

1

Jeg stødte ind i en maskine eller andet

maskinamut allamulluunniit aporama

1

Jeg fik fingrene i klemme

Inussakka kiggippakka

1

Jeg blev ramt af en genstand der faldt ned

atortussiamik nakkartumik eqqortikkama

1

Jeg blev slynget mod en maskine eller andet (ulykke på et skib)

Maskinamik allamulluunniit igeriussaagama (angallammi ajoquserneq)

1

Skete ulykken på en anden måde (skriv) \_\_\_\_\_

Ajoquserneq allatut pivooq (allaguk)

## 53. Hvilken skade skete der?

(man må gerne sætte flere kryds)

Ajoquserneq suna pineqarpa?

(arlalinnik krydsiisinaavutit)

Jeg fik et sår der skulle behandles på sygehuset

Napparsimmavimmi passunneqartarialimmik kilerpunga

1

Jeg fik et mindre snitsår

annikitsumik kilerpunga

1

Jeg fik et pludseligt smæld i lænderyggen i forbindelse med et løft

kivitsinikkut tassangaannaq makisiga seqqorpoq

1

Jeg fik en klemning af fingre eller andet

inussakka allalluunniit kiggippakka

1

Jeg brækkede en finger

inuaga napivooq

1

Jeg brækkede et ribben

najungasora napivooq

1

Var der tale om en anden type skade? (skriv hvilken): \_\_\_\_\_

Allatut ittumik ajoquserpit? (suunersoq allaguk):

## 54. Har du på et tidspunkt fået anmeldt en sygdom til Arbejdsskadestyrelsen?

Nappaammik Arbejdsskadestyrelsemut nappaammik nalunaaruteqarnikuut?

Nej  
2 Naamik

Ja  
1 AAP

Årstal \_\_\_\_\_

Ukioq

Skade \_\_\_\_\_

Nappat

Årstal \_\_\_\_\_

Ukioq

Skade \_\_\_\_\_

Nappat

## 55. Har du på et tidspunkt fået anmeldt en arbejdsulykke til Arbejdsskadestyrelsen?

Sulisillutit ajoquserninnik Arbejdsskadestyrelsemut nalunaaruteqarnikuut?

Nej  
2 Naamik

Ja  
1 Aap

Årstal \_\_\_\_\_

Ukioq

Type ulykke \_\_\_\_\_

Ajoqusernerup annertussusaa

Årstal \_\_\_\_\_

Ukioq

Type ulykke \_\_\_\_\_

Ajoqusernerup annertussusaa

## BEMÆRKNINGER

***Tak for din medvirken.*** Hvis du har flere oplysninger om dit helbred, eller hvis der er andet du vil fortælle os, så skriv her:

Qujanaq peqataagavit. Peqqissutsit pillugu amerlanerusunik paasisutissaateqaruit imaluunniit allamik oqaluttuukkusukkutsigut uani allagit:

---

---

---

---

---

---

---

---

---

---

---

---

---
